# Supplementary material
Source: PubMed Central journal article supplement (PMC4944690)
Supplement: SD3.pdf [file SD3.pdf]

SUPPLEMENTAL TABLE 1  
Information of DENV-1 sequences used in phylogenetic analysis

| DENVs strain in this study  | GenBank accession number | Strain                     | Genotype |
|-----------------------------|--------------------------|----------------------------|----------|
| EU448401/Indonesia/2007     | EU448401                 | DENV-1/ID/0705aTw/2007     | I        |
| FJ158609/China/2007         | FJ158609                 | DENV-1/CN/D07037/2007      | I        |
| FJ687478/Korea/2008         | FJ687478                 | DENV-1/KR/DenKor-12/2008   | I        |
| KM204119/United States/1944 | KM204119                 | DENV-1/US/Hawaii1/1944     | I        |
| EU848545/United States/1944 | EU848545                 | DENV-1/US/Hawaii/1944      | I        |
| AB074760/Japan/1943         | AB074760                 | DENV-1/JP/Mochizuki/1943   | I        |
| KM216689/Indonesia/2011     | KM216689                 | DENV-1/ID/Bali_071/2011    | I        |
| JF967947/Indonesia/2010     | JF967947                 | DENV-1/ID/1011bTw/2010     | I        |
| JF967825/Indonesia/2008     | JF967825                 | DENV-1/ID/0808aTw/2008     | I        |
| AF425629/Thailand/1983      | AF425629                 | DENV-1/TH/2543-63/1983     | II       |
| AF180817/Thailand/1964      | AF180817                 | DENV-1/TH/16007/1964       | II       |
| KCS589010/Indonesia/2012    | KCS589010                | DENV-1/ID/SMG-SE003/2012   | II       |
| JQ922547/Thailand/1960      | JQ922547                 | DENV-1/TH/606147/1960      | II       |
| EF457905/Myanmar/1972       | EF457905                 | DENV-1/MY/P72-1244/1972    | III      |
| FN825674/Myanmar/2005       | FN825674                 | DENV-1/MY/36046/2005       | III      |
| EU448403/Vietnam/2006       | EU448403                 | DENV-1/VN/612aTw/2006      | IV       |
| EU448405/Philippines/2007   | EU448405                 | DENV-1/PH/0706aTw/2007     | IV       |
| JF967938/Philippines/2010   | JF967938                 | DENV-1/PH/1009cTw/2010     | IV       |
| JN415516/Philippines/2005   | JN415516                 | DENV-1/PH/Philippines/2005 | IV       |
| EU448406/Philippines/2003   | EU448406                 | DENV-1/PH/0301aTw/2003     | IV       |
| KM279411/Mexico/2012        | KM279411                 | DENV-1/MX/DB137/2012       | V        |
| DQ016656/Nicaragua/1996     | DQ016656                 | DENV-1/NI/NI04VI04/1996    | V        |
| KF973473/Nicaragua/2012     | KF973473                 | DENV-1/NI/BID-V7691/2012   | V        |
| JX891660/El Salvador/2012   | JX891660                 | DENV-1/SV/DB109/2012       | V        |
| JF937635/Nicaragua/2009     | JF937635                 | DENV-1/NI/BID-V5504/2009   | V        |
| GU131970/Mexico/2007        | GU131970                 | DENV-1/MX/BID-V3703/2007   | V        |
| GQ868499/Mexico/2006        | GQ868499                 | DENV-1/MX/BID-V3664/2006   | V        |
| GQ199858/Nicaragua/2008     | GQ199858                 | DENV-1/NI/BID-V2646/2008   | V        |
| GQ199857/Nicaragua/2008     | GQ199857                 | DENV-1/NI/BID-V2645/2008   | V        |
| FJ898433/Nicaragua/2007     | FJ898433                 | DENV-1/NI/BID-V1223/2007   | V        |
| FJ639735/Venezuela/1997     | FJ639735                 | DENV-1/VE/BID-V2162/1997   | V        |
| FJ410188/United States/1996 | FJ410188                 | DENV-1/US/BID-V2139/1996   | V        |
| AY153755/Costa Rica/1993    | AY153755                 | DENV-1/CR/cesara1/1993     | V        |
| FJ562104/Nicaragua/2006     | FJ562104                 | DENV-1/NI/BID-V2343/2006   | V        |
| FJ547088/Nicaragua/2008     | FJ547088                 | DENV-1/NI/BID-V2330/2008   | V        |
| KF973459/Nicaragua/2011     | KF973459                 | DENV-1/NI/BID-V7659/2011   | V        |
| KF973471/Nicaragua/2012     | KF973471                 | DENV-1/NI/BID-V7686/2012   | V        |
| KF973453/Nicaragua/2011     | KF973453                 | DENV-1/NI/BID-V7640/2011   | V        |
| KF973470/Nicaragua/2012     | KF973470                 | DENV-1/NI/BID-V7685/2012   | V        |
| KF973464/Nicaragua/2012     | KF973464                 | DENV-1/NI/BID-V7677/2012   | V        |
| JN819403/Nicaragua/2006     | JN819403                 | DENV-1/NI/BID-V746/2006    | V        |
| JQ425061/United States/2009 | JQ425061                 | DENV-1/US/DB072/2009       | V        |
| KJ415092/China/2013         | KJ415092                 | DENV-1/CN/ZJ/01/2013       | V        |
| JQ675358/United States/2010 | JQ675358                 | DENV-1/US/BOL-KW010/2010   | V        |
| JF519855/United States/2010 | JF519855                 | DENV-1/US/KW10AG/2010      | V        |
| JQ425068/United States/2009 | JQ425068                 | DENV-1/US/DB079/2009       | V        |
| JQ425069/United States/2010 | JQ425069                 | DENV-1/US/DB080/2010       | V        |
| JQ425063/United States/2009 | JQ425063                 | DENV-1/US/DB074/2009       | V        |
| GQ199872/Nicaragua/2004     | GQ199872                 | DENV-1/NI/BID-V617/2004    | V        |
| GU131966/Mexico/2007        | GU131966                 | DENV-1/MX/BID-V3679/2007   | V        |
| KF955433/Mexico/2008        | KF955433                 | DENV-1/MX/BID-V3751/2008   | V        |
| KF955419/Mexico/2007        | KF955419                 | DENV-1/MX/BID-V3674/2007   | V        |
| KJ189319/Mexico/2007        | KJ189319                 | DENV-1/MX/BID-V7580/2007   | V        |
| JQ425062/United States/2009 | JQ425062                 | DENV-1/US/DB073/2009       | V        |
| KF973463/Nicaragua/2012     | KF973463                 | DENV-1/NI/BID-V7676/2012   | V        |
| KF973475/Nicaragua/2012     | KF973475                 | DENV-1/NI/BID-V7696/2012   | V        |
| KF973467/Nicaragua/2012     | KF973467                 | DENV-1/NI/BID-V7681/2012   | V        |
| KF973466/Nicaragua/2012     | KF973466                 | DENV-1/NI/BID-V7680/2012   | V        |
| AY153756/Costa Rica/1993    | AY153756                 | DENV-1/CR/cesara13/1993    | V        |
| AY153757/Costa Rica/1993    | AY153757                 | DENV-1/CR/cesara12/1993    | V        |
| JQ045564/United States/2010 | JQ045564                 | DENV-1/US/ARC-39-10/2010   | V        |
| JF804016/Costa Rica/2005    | JF804016                 | DENV-1/CR/DB003/2005       | V        |
| FJ850113/Nicaragua/2005     | FJ850113                 | DENV-1/NI/BID-V536/2005    | V        |
| EU482615/Nicaragua/2005     | EU482615                 | DENV-1/NI/BID-V1069/2005   | V        |
| KF955417/Mexico/2006        | KF955417                 | DENV-1/MX/BID-V3663/2006   | V        |
| KJ189317/Mexico/2007        | KJ189317                 | DENV-1/MX/BID-V7572/2007   | V        |
| GU131963/Mexico/2007        | GU131963                 | DENV-1/MX/BID-V4671/2007   | V        |
| DQ016657/Nicaragua/2003     | DQ016657                 | DENV-1/NI/CNM436VI03/2003  | V        |
| HM171558/Mexico/2006        | HM171558                 | DENV-1/MX/Veracruz/23/2006 | V        |
| KF955403/Nicaragua/2005     | KF955403                 | DENV-1/NI/BID-V622/2005    | V        |
| FJ478457/United States/1996 | FJ478457                 | DENV-1/US/BID-V2138/1996   | V        |

DENV = dengue virus.

SUPPLEMENTAL TABLE 2  
Information of DENV-2 sequences used in phylogenetic analysis

| DENVs strains in this study | GenBank accession number | Strain                           | Genotype       |
|-----------------------------|--------------------------|----------------------------------|----------------|
| KF752595/Argentina/2012     | KF752595                 | DENV-2/AR/V0/2012                | American       |
| KF752594/Argentina/2012     | KF752594                 | DENV-2/AR/M10/2012               | American       |
| JQ686088/Brazil/2012        | JQ686088                 | DENV-2/BR/JHA1/2012              | American       |
| L10053/Trinidad/1953        | L10053                   | DENV-2/TT/TRIN-53/1953           | American       |
| L10043/India/1957           | L10043                   | DENV-2/IN/INDIA/1957             | American       |
| FJ538910/India/1964         | FJ538910                 | DENV-2/IN/NIV-64553/1964         | American       |
| AY158339/Perú/1996          | AY158339                 | DENV-2/PE/Iqt2913/1996           | American       |
| L10046/Puerto Rico/1969     | L10046                   | DENV-2/PR/PR159/1969             | American       |
| AY449675/Mexico/1984        | AY449675                 | DENV-2/MX/SJL1782/Mexico 84/1984 | American       |
| AY158328/Venezuela/1987     | AY158328                 | DENV-2/VE/Ven2/1987              | American       |
| AY466449/Mexico/1994        | AY466449                 | DENV-2/MX/BC134-Merida-94/1994   | American       |
| AY158338/Mexico/1995        | AY158338                 | DENV-2/MX/328298/1995            | American       |
| AY158332/Mexico/1992        | AY158332                 | DENV-2/MX/131/1992               | American       |
| DQ364564/Costa_Rica/1994    | DQ364564                 | DENV-2/CR/CR_B_94/1994           | American       |
| DQ364561/Costa_Rica/1994    | DQ364561                 | DENV-2/CR/CR_A_94/1994           | American       |
| M84727/Thailand/1964        | M84727                   | DENV-2/TH/16681/1964             | Asian 1        |
| X15434/Malaysia/1989        | X15434                   | DENV-2/MY/M1/1989                | Asian 1        |
| U31949/Thailand/1993        | U31949                   | DENV-2/TH/ThNH-7/93/1993         | Asian 1        |
| D00345/Thailand/1980        | D00345                   | DENV-2/TH/PUO-218/1980           | Asian 1        |
| L10052/Taiwan/1987          | L10052                   | DENV-2/TW/TAIWAN/1987            | Asian 2        |
| AF295700/Philippines/1995   | AF295700                 | DENV-2/PH/DOH 078/1995           | Asian 2        |
| L10045/Philippines/1983     | L10045                   | DENV-2/PH/2088/1983              | Asian 2        |
| AF204178/China/1987         | AF204178                 | DENV-2/CN/43/1987                | Asian 2        |
| FJ744709/Nicaragua/2008     | FJ744709                 | DENV-2/NI/BID-V2351/2008         | Asian/American |
| EU482691/Nicaragua/2006     | EU482691                 | DENV-2/NI/BID-V579/2006          | Asian/American |
| EU482683/Nicaragua/2006     | EU482683                 | DENV-2/NI/BID-V570/2006          | Asian/American |
| EU482620/Nicaragua/2006     | EU482620                 | DENV-2/NI/BID-V1074/2006         | Asian/American |
| FJ205885/Nicaragua/2008     | FJ205885                 | DENV-2/NI/BID-V1721/2008         | Asian/American |
| EU596483/Nicaragua/2006     | EU596483                 | DENV-2/NI/BID-V608/2006          | Asian/American |
| EU482692/Nicaragua/2006     | EU482692                 | DENV-2/NI/BID-V580/2006          | Asian/American |
| EU482693/Nicaragua/2006     | EU482693                 | DENV-2/NI/BID-V581/2006          | Asian/American |
| EU482696/Nicaragua/2006     | EU482696                 | DENV-2/NI/BID-V747/2006          | Asian/American |
| EU482689/Nicaragua/2006     | EU482689                 | DENV-2/NI/BID-V576/2006          | Asian/American |
| EU482757/Nicaragua/2005     | EU482757                 | DENV-2/NI/BID-V535/2005          | Asian/American |
| EU482748/Nicaragua/2005     | EU482748                 | DENV-2/NI/BID-V513/2005          | Asian/American |
| EU482603/Nicaragua/2007     | EU482603                 | DENV-2/NI/BID-V615/2007          | Asian/American |
| FJ850117/Nicaragua/2000     | FJ850117                 | DENV-2/NI/BID-V2657/2000         | Asian/American |
| FJ850065/Nicaragua/2000     | FJ850065                 | DENV-2/NI/BID-V2664/2000         | Asian/American |
| GQ199895/Nicaragua/1999     | GQ199895                 | DENV-2/NI/BID-V2683/1999         | Asian/American |
| FJ850120/Nicaragua/2001     | FJ850120                 | DENV-2/NI/BID-V2673/2001         | Asian/American |
| FJ744745/Nicaragua/2000     | FJ744745                 | DENV-2/NI/BID-V2362/2000         | Asian/American |
| FJ744744/Nicaragua/2000     | FJ744744                 | DENV-2/NI/BID-V2364/2000         | Asian/American |
| FJ850118/Nicaragua/2000     | FJ850118                 | DENV-2/NI/BID-V2658/2000         | Asian/American |
| EU482632/Nicaragua/2005     | EU482632                 | DENV-2/NI/BID-V620/2005          | Asian/American |
| FJ744704/Nicaragua/2001     | FJ744704                 | DENV-2/NI/BID-V2361/2001         | Asian/American |
| FJ850066/Nicaragua/2000     | FJ850066                 | DENV-2/NI/BID-V2665/2000         | Asian/American |
| FJ850062/Nicaragua/2000     | FJ850062                 | DENV-2/NI/BID-V2659/2000         | Asian/American |
| FJ744705/Nicaragua/2000     | FJ744705                 | DENV-2/NI/BID-V2363/2000         | Asian/American |
| FJ850063/Nicaragua/2000     | FJ850063                 | DENV-2/NI/BID-V2660/2000         | Asian/American |
| HM210474/Venezuela/2005     | HM210474                 | DENV-2/VE/LARD28105/2005         | Asian/American |
| FJ639734/Venezuela/2003     | FJ639734                 | DENV-2/VE/BID-V2160/2003         | Asian/American |
| GQ868557/Colombia/2005      | GQ868557                 | DENV-2/CO/BID-V3373/2005         | Asian/American |
| GQ868555/Colombia/2005      | GQ868555                 | DENV-2/CO/BID-V3371/2005         | Asian/American |
| GU131947/Colombia/2007      | GU131947                 | DENV-2/CO/BID-V3374/2007         | Asian/American |
| HM210480/Venezuela/2003     | HM210480                 | DENV-2/VE/LARD19094/2003         | Asian/American |
| GQ868558/Colombia/2007      | GQ868558                 | DENV-2/CO/BID-V3375/2007         | Asian/American |
| M24444/Thailand/1980        | M24444                   | DENV-2/TH/D2-D80-141/1980        | Asian/American |
| AF195041/Thailand/1989      | AF195041                 | DENV-2/TH/D89-828/1989           | Asian/American |
| AF195042/Thailand/1984      | AF195042                 | DENV-2/TH/D84-481/1984           | Asian/American |
| DQ181820/Thailand/1982      | DQ181820                 | DENV-2/TH/ThD2_0165_82/1982      | Asian/American |
| DQ181818/Thailand/1983      | DQ181818                 | DENV-2/TH/ThD2_0014_83/1983      | Asian/American |
| AF195043/Thailand/1983      | AF195043                 | DENV-2/TH/D83-061/1983           | Asian/American |
| DQ364514/Costa_Rica/2000    | DQ364514                 | DENV-2/CR/CR_7945_00/2000        | Asian/American |
| DQ364513/Costa_Rica/2000    | DQ364513                 | DENV-2/CR/CR_6530_00/2000        | Asian/American |
| JF804030/Costa_Rica/2003    | JF804030                 | DENV-2/CR/DB017/2003             | Asian/American |
| L10055/Sri Lanka/1989       | L10055                   | DENV-2/LK/SL714/1989             | Cosmopolitan   |
| AF410378/Saudi Arabia/1992  | AF410378                 | DENV-2/SA/CAMR16/1992            | Cosmopolitan   |
| AF410370/Australia/1992     | AF410370                 | DENV-2/AU/CAMR5/1992             | Cosmopolitan   |
| L10047/Seychelles/1977      | L10047                   | DENV-2/SC/SEY-42/1977            | Cosmopolitan   |
| AF410377/Thailand/1998      | AF410377                 | DENV-2/TH/CAMR14/1998            | Cosmopolitan   |
| L10051/Somalia/1984         | L10051                   | DENV-2/SO/SOMALIA/1984           | Cosmopolitan   |
| L10044/Indonesia/1976       | L10044                   | DENV-2/ID/INDON/1976             | Cosmopolitan   |
| AY449677/Mexico/1996        | AY449677                 | DENV-2/MX/BC17/Merida 96/1996    | Cosmopolitan   |

DENV = dengue virus.
